# Supplementary material for: Biosimilars for the Treatment of Cancer: A Systematic Review of Published Evidence
Source: PubMed Central journal article supplement — BioDrugs. 2017 Jan 11;31(1):1–36. doi: 10.1007/s40259-016-0207-0 (PMC5258783; doi:10.1007/s40259-016-0207-0), 2017-01-11
Supplement: 40259_2016_207_MOESM1_ESM.pdf [file 40259_2016_207_MOESM1_ESM.pdf]

**Biosimilars for the Treatment of Cancer: A Systematic Review of Published Evidence**

Ira Jacobs\*, Reginald Ewesuedo, Sadiq Lula, Charles Zacharchuk

\*Corresponding author: Ira Jacobs; Pfizer Essential Health, Pfizer Inc, 235 East 42nd Street, New York, NY, 10017-5755, USA.

Email: ira.jacobs@pfizer.com

**Supplementary Table S1. Conference proceedings searched between January 1, 2012 and July 31, 2015**

| <b>Conference proceeding</b>                                                                                                                   | <b>Abbreviation</b> |
|------------------------------------------------------------------------------------------------------------------------------------------------|---------------------|
| American Association of Pharmaceutical Scientists/National Biotechnology Conference                                                            | AAPS/NBC            |
| American Society of Clinical Oncology                                                                                                          | ASCO                |
| American Society for Clinical Pharmacology and Therapeutics                                                                                    | ASCPT               |
| California Separation Science Society                                                                                                          | CASSS               |
| Analytical Technologies Europe                                                                                                                 | AT Europe           |
| Bay Area Discussion Group                                                                                                                      | BADG                |
| Bioassays                                                                                                                                      | –                   |
| Capillary Electrophoresis in the Biotechnology and Pharmaceutical Industries                                                                   | CE Pharm            |
| Chemistry, Manufacturing and Controls Strategy Forum                                                                                           | CMC Forum           |
| DC Area Scientific Discussion Group                                                                                                            | DCADG               |
| Symposium on Higher Order Structure of Protein Therapeutics Practical Applications of Mass Spectrometry in the Biotechnology Industry          | HOS<br>Mass Spec    |
| Well-Characterized Biotechnology Products – Symposium on the Interface of Regulatory and Analytical Sciences for Biotechnology Health Products | WCBP                |
| European Congress of Immunology                                                                                                                | ECI                 |
| European Society for Medical Oncology                                                                                                          | ESMO                |
| International Association for the Study of Lung Cancer                                                                                         | IASLC               |
| International Society for Pharmacoeconomics and Outcomes Research                                                                              | ISPOR               |
| San Antonio Breast Cancer Symposium                                                                                                            | SABCS               |
| Society of Toxicology                                                                                                                          | SoT                 |
