# Supplementary material for: Biosimilars for the Treatment of Cancer: A Systematic Review of Published Evidence
Source: PubMed Central journal article supplement — BioDrugs. 2017 Jan 11;31(1):1–36. doi: 10.1007/s40259-016-0207-0 (PMC5258783; doi:10.1007/s40259-016-0207-0), 2017-01-11
Supplement: 40259_2016_207_MOESM2_ESM.pdf [file 40259_2016_207_MOESM2_ESM.pdf]

**Supplementary Table S2. NICE STA critical appraisal for randomized controlled trials**

| Category                        | Study question                                                                                                                                                                                               | How is the question addressed in the study? | Grade (yes / no / not clear) |
|---------------------------------|--------------------------------------------------------------------------------------------------------------------------------------------------------------------------------------------------------------|---------------------------------------------|------------------------------|
| Randomization                   | Was randomization carried out appropriately?<br>Was the concealment of treatment allocation adequate?                                                                                                        |                                             |                              |
| Baseline                        | Were the groups similar at the outset of the study in terms of prognostic factors, for example, severity of disease?                                                                                         |                                             |                              |
| Blinding                        | Were the care providers, participants, and outcome assessors blind to treatment allocation? If any of these people were not blinded, what might be the likely impact on the risk of bias (for each outcome)? |                                             |                              |
| Withdrawals                     | Were there any unexpected imbalances in drop-outs between groups? If so, were they explained or adjusted for?                                                                                                |                                             |                              |
| Outcome selection and reporting | Is there any evidence to suggest that the authors measured more outcomes than they reported?                                                                                                                 |                                             |                              |
| Statistical analysis            | Did the analysis include an intention-to-treat analysis? If so, was this appropriate and were appropriate methods used to account for missing data?                                                          |                                             |                              |
