# Supplementary material for: Biosimilars for the Treatment of Cancer: A Systematic Review of Published Evidence
Source: PubMed Central journal article supplement — BioDrugs. 2017 Jan 11;31(1):1–36. doi: 10.1007/s40259-016-0207-0 (PMC5258783; doi:10.1007/s40259-016-0207-0), 2017-01-11
Supplement: 40259_2016_207_MOESM6_ESM.pdf [file 40259_2016_207_MOESM6_ESM.pdf]

**Supplementary Table S6. Summary of planned and ongoing clinical trials for proposed biosimilars of bevacizumab, rituximab, and trastuzumab in oncology**

|                                                     | Biosimilar<br>(alternative<br>name[s];<br>company)  | Phase<br>(studies)                                      | Interventions                                                           | Disease                                                                                                           | Outcome<br>measures                        | Enrollment<br>N       | Start or<br>end date    | Status |
|-----------------------------------------------------|-----------------------------------------------------|---------------------------------------------------------|-------------------------------------------------------------------------|-------------------------------------------------------------------------------------------------------------------|--------------------------------------------|-----------------------|-------------------------|--------|
| <b>Bevacizumab</b>                                  | ABP 215<br>(Amgen/Allergan)                         | Comparative<br>efficacy/safety<br>(1) [1]               | ABP 215 or beva                                                         | Metastatic non-<br>small-cell lung<br>cancer                                                                      | Efficacy, safety                           | 642                   | Oct 2013/<br>Sep 2015   | ANR    |
|                                                     | BCD-021<br>(Biocad)                                 | Comparative<br>efficacy/safety<br>(1) [2]               | BCD-021 or beva                                                         | Non-small-cell lung<br>cancer                                                                                     | Efficacy, safety                           | 214                   | Oct 2012/<br>Nov 2015   | ANR    |
|                                                     | BEVZ92<br>(mAbxience/<br>Laboratorio<br>Elea/LIBBS) | PK/safety (1)<br>[3]                                    | BEVZ92 or beva                                                          | Metastatic<br>colorectal cancer                                                                                   | PK, efficacy,<br>safety, ADA <sub>b</sub>  | 100                   | Oct 2014/<br>Sep 2016   | R      |
|                                                     | PF-06439535<br>(Pfizer)                             | PK/safety (1)<br>[4]                                    | PF-06439535 or beva                                                     | Healthy                                                                                                           | PK parameters                              | 102                   | Jan 2014/<br>Aug 2014   | C      |
|                                                     |                                                     | Comparative<br>efficacy/safety<br>(1) [5]               | PF-06439535 or<br>beva-EU                                               | Non-small-cell lung<br>cancer                                                                                     | Efficacy                                   | 710                   | Apr 2015/<br>Jan 2018   | R      |
| SB8 (Samsung<br>Bioepis)                            | PK/safety (1)<br>[6]                                | SB8 or beva                                             | Healthy                                                                 | PK, safety, ADA <sub>b</sub>                                                                                      | 114                                        | May 2015/<br>NP       | NYR                     |        |
| <b>Rituximab</b>                                    | BCD-020<br>(Biocad)                                 | Comparative<br>efficacy/safety<br>(1) [7]               | BCD-020 or MabThera<br>(ritux-EU)                                       | Follicular non-<br>Hodgkin lymphoma<br>or nodal marginal<br>zone lymphoma or<br>splenic marginal<br>zone lymphoma | Efficacy, safety                           | 134                   | Sep 2011/<br>Dec 2015   | R      |
|                                                     | CT-P10<br>(Celltrion)                               | Comparative<br>efficacy/safety<br>(2) [8, 9]            | CT-P10<br>or Rituxan (ritux)                                            | Follicular lymphoma                                                                                               | PK, efficacy                               | 250                   | Jun 2014/<br>Jun 2020   | R      |
|                                                     |                                                     |                                                         | CT-P10<br>or Rituxan (ritux)                                            | Follicular lymphoma                                                                                               | Efficacy, safety                           | 104                   | Oct 2015/<br>Aug 2020   | NYR    |
|                                                     | GP2013<br>(Sandoz/<br>Novartis)                     | Comparative<br>efficacy/safety<br>(1) [10]              | GP2013/Ritux                                                            | Follicular lymphoma                                                                                               | Efficacy, safety                           | 618                   | Dec 2011/<br>Mar 2018   | ANR    |
|                                                     | PF-05280586<br>(Pfizer)                             | Comparative<br>efficacy/safety<br>(1) [11]              | PF-05280586 or<br>MabThera (ritux-EU)                                   | Follicular lymphoma                                                                                               | Efficacy, safety                           | 394                   | Sep 2014/<br>May 2017   | R      |
| RTXM83<br>(mAbxience/<br>Laboratorio<br>Elea/LIBBS) | Comparative<br>efficacy/safety<br>(1) [12]          | RTXM83 + CHOP or<br>ritux + CHOP                        | Diffuse large B-cell<br>lymphoma                                        | Efficacy, safety,<br>PK, PD,<br>immunogenicity                                                                    | 250                                        | May 2013/<br>NP       | R                       |        |
| <b>Trastuzumab</b>                                  | ABP 980<br>(Amgen/Allergan)                         | Comparative<br>efficacy/safety<br>(1) [13]              | ABP 980/tras/<br>epirubicin/<br>cyclophosphamide/<br>paclitaxel         | Breast cancer                                                                                                     | Efficacy, safety                           | 808                   | Apr 2014/<br>Feb 2017   | R      |
|                                                     | BCD-022<br>(Biocad)                                 | Comparative<br>efficacy/safety<br>(1) [14]              | BCD-022/tras/<br>paclitaxel                                             | HER2 <sup>+</sup> metastatic<br>breast cancer                                                                     | Efficacy, safety,<br>PK                    | 206                   | Oct 2012/<br>Mar 2015   | ANR    |
|                                                     | CT-P6 (Celltrion)                                   | Comparative<br>efficacy/safety<br>(2) [15, 16]          | CT-P6/Herceptin<br>(tras)/paclitaxel                                    | Metastatic breast<br>cancer                                                                                       | Efficacy, safety                           | 383                   | Jun 2010/<br>Dec 2017   | ANR    |
|                                                     |                                                     |                                                         | CT-P6/Herceptin (tras)                                                  | HER2 <sup>+</sup> breast<br>cancer                                                                                | Efficacy, safety                           | 532                   | June 2014/<br>June 2019 | R      |
|                                                     | PF-05280014<br>(Pfizer)                             | PK/safety (1)<br>[17]                                   | PF-05280014/<br>Herceptin (tras)                                        | Healthy                                                                                                           | Safety                                     | 162                   | Jan 2014/<br>Feb 2014   | C      |
|                                                     |                                                     | Clinical (1) [18] <sup>a</sup>                          | PF-05280014/<br>Taxotere/Paraplatin/<br>tras-EU/Taxotere/<br>Paraplatin | Early-stage breast<br>cancer                                                                                      | PK, efficacy,<br>Safety,<br>immunogenicity | 220                   | Sept 2014/<br>Dec 2016  | R      |
|                                                     |                                                     | Comparative<br>efficacy/safety<br>(1) [19] <sup>a</sup> | PF-05280014/<br>paclitaxel/Herceptin<br>(tras)/paclitaxel               | Metastatic breast<br>cancer                                                                                       | Efficacy, safety,<br>immunogenicity,<br>PK | 690                   | Mar 18/<br>Sep 2015     | R      |
| SB3 (Samsung<br>Bioepis)                            | PK/safety (1)<br>[20]                               | SB3/Herceptin (tras)                                    | Healthy                                                                 | PK, safety                                                                                                        | 109                                        | Feb 2014/<br>May 2014 | C                       |        |
|                                                     | Comparative<br>efficacy/safety<br>(1) [21]          | SB3/Herceptin (tras-<br>EU)/Herceptin (tras-<br>US)     | HER2 <sup>+</sup> early or<br>locally advanced<br>breast cancer         | Efficacy                                                                                                          | 806                                        | Apr 2014/<br>May 2016 | R                       |        |

ADA<sub>b</sub> antidrug antibody, ANR Active not yet recruiting, beva bevacizumab, C Completed, CHOP cyclophosphamide, doxorubicin, vincristine, prednisolone, HER2 human epidermal growth factor receptor 2, NP not provided, NYR not yet recruiting, PD pharmacodynamics, PK pharmacokinetics, R recruiting, ritux rituximab, tras trastuzumab

<sup>a</sup> Studies with published protocols (see Table 3 in the print edition).

References (next page)

1. ClinicalTrials.gov. Efficacy and safety study of ABP 215 compared with bevacizumab in subjects with advanced non-small cell lung cancer. National Institutes of Health, US National Library of Medicine, Bethesda, MD. 2013 (last update 28 April 2016). <https://clinicaltrials.gov/show/NCT01966003>. Accessed 21 June 2016. 2. ClinicalTrials.gov. A safety and efficacy study of BCD-021 with paclitaxel and carboplatin compared to Avastin with paclitaxel and carboplatin in non-small cell lung cancer. National Institutes of Health, US National Library of Medicine, Bethesda, MD. 2012 (last update 2 Feb 2015). <https://clinicaltrials.gov/show/NCT01763645>. Accessed 21 June 2016. 3. ClinicalTrials.gov. Bioequivalence study bevacizumab biosimilar (BEVZ92) versus bevacizumab (Avastin®) in first-line treatment mCRC patients. National Institutes of Health, US National Library of Medicine, Bethesda, MD. 2014 (last update 19 May 2016). <https://clinicaltrials.gov/show/NCT02069704>. Accessed 21 June 2016. 4. ClinicalTrials.gov. A pharmacokinetic study comparing PF-06439535 and bevacizumab in healthy male volunteers (REFLECTIONS B739-01). National Institutes of Health, US National Library of Medicine, Bethesda, MD. 2014 (last update 14 Aug 2014). <https://clinicaltrials.gov/show/NCT02031991>. Accessed 21 June 2016. 5. ClinicalTrials.gov. A comparative study of PF-06439535 plus paclitaxel-carboplatin and bevacizumab plus paclitaxel-carboplatin patients with advanced non-squamous NSCLC. National Institutes of Health, US National Library of Medicine, Bethesda, MD. 2015 (last update 12 Aug 2015). <https://clinicaltrials.gov/show/NCT02364999>. Accessed 21 June 2016. 6. ClinicalTrials.gov. Pharmacokinetic, safety, tolerability, and immunogenicity study of SB8 in healthy male subjects. National Institutes of Health, US National Library of Medicine, Bethesda, MD. 2015 (last update 24 Nov 2015). <https://clinicaltrials.gov/show/NCT02453672>. Accessed 21 June 2016. 7. Jacobs I, et al. Monoclonal antibody and fusion protein biosimilars across therapeutic areas: a systematic review of published evidence. *BioDrugs*. 2016; in press. 8. ClinicalTrials.gov. To demonstrate equivalence of pharmacokinetics and noninferiority of efficacy for CT-P10 in comparison with Rituxan (rituximab). National Institutes of Health, US National Library of Medicine, Bethesda, MD. 2014 (last update 11 Feb 2016). <https://clinicaltrials.gov/show/NCT02162771>. Accessed 21 June 2016. 9. ClinicalTrials.gov. To compare efficacy and safety between CT-P10 and Rituxan in patients with low tumour burden follicular lymphoma. National Institutes of Health, US National Library of Medicine, Bethesda, MD. 2014 (last update 25 April 2016). <https://clinicaltrials.gov/show/NCT02260804>. Accessed 21 June 2016. 10. ClinicalTrials.gov. GP2013 in the treatment of patients with previously untreated, advanced stage follicular lymphoma (ASSIST\_FL). National Institutes of Health, US National Library of Medicine, Bethesda, MD. 2011 (last update 15 March 2016). <https://clinicaltrials.gov/show/NCT01419665>. Accessed 21 June 2016. 11. ClinicalTrials.gov. A study of PF-05280586 (rituximab-Pfizer) or MabThera® (rituximab-EU) for the first-line treatment of patients with CD20-positive, low tumor burden, follicular lymphoma (REFLECTIONS B328-06). National Institutes of Health, US National Library of Medicine, Bethesda, MD. 2014 (last update 5 July 2016). <https://clinicaltrials.gov/show/NCT02213263>. Accessed 21 June 2016. 12. ClinicalTrials.gov. Study of RTX83 plus CHOP chemotherapy versus a rituximab plus CHOP therapy in patients with non Hodgkin's lymphoma. National Institutes of Health, US National Library of Medicine, Bethesda, MD. 2014 (last update 19 May 2016). <https://clinicaltrials.gov/show/NCT02268045>. Accessed 21 June 2016. 13. ClinicalTrials.gov. Efficacy and safety study of ABP 980 compared with trastuzumab in subjects with HER2 positive early breast cancer (Lilac). National Institutes of Health, US National Library of Medicine, Bethesda, MD. 2013 (last update 11 May 2016). <https://clinicaltrials.gov/show/NCT01901146>. Accessed 21 June 2016. 14. ClinicalTrials.gov. A safety and efficacy study of BCD-022 with paclitaxel compared to Herceptin with paclitaxel in HER2-positive metastatic breast cancer patients. National Institutes of Health, US National Library of Medicine, Bethesda, MD. 2013 (last update 2 Feb 2015). <https://clinicaltrials.gov/show/NCT01764022>. Accessed 21 June 2016. 15. ClinicalTrials.gov. Demonstrate efficacy and safety of metastatic breast cancer (Compare). National Institutes of Health, US National Library of Medicine, Bethesda, MD. 2010 (last update 11 Feb 2015). <https://clinicaltrials.gov/show/NCT01084876>. Accessed 21 June 2016. 16. ClinicalTrials.gov. Efficacy and safety evaluating study of CT-P6 in HER2 positive early breast cancer. National Institutes of Health, US National Library of Medicine, Bethesda, MD. 2014 (last update 17 Dec 2015). <https://clinicaltrials.gov/show/NCT02162667>. Accessed 21 June 2016. 17. ClinicalTrials.gov. A study evaluating the safety of PF-05280014 and trastuzumab in healthy male volunteers (REFLECTIONS B327-06). National Institutes of Health, US National Library of Medicine, Bethesda, MD. 2013 (last update 21 April 2014). <https://clinicaltrials.gov/show/NCT02015156>. Accessed 21 June 2016. 18. Jacobs I, et al. A phase 3 randomized, double-blind trial comparing PF-05280014 + docetaxel and carboplatin vs. trastuzumab + docetaxel and carboplatin for neoadjuvant treatment of operable HER2+ breast cancer. *Cancer Res*. 2015;75(9 suppl):Abstr OT3-1-02. 19. Ewesuedo R, et al. A phase 3 randomized, double-blind trial comparing PF-05280014 + paclitaxel vs. trastuzumab + paclitaxel for treatment of HER2+ metastatic breast cancer. *Cancer Res* 2013;73. 20. ClinicalTrials.gov. Pharmacokinetic, safety, tolerability and immunogenicity study of SB3 in healthy male subjects. National Institutes of Health, US National Library of Medicine, Bethesda, MD. 2014 (last update 19 May 2014). <https://clinicaltrials.gov/show/NCT02075073>. Accessed 21 June 2016. 21. ClinicalTrials.gov. A study to compare the effect of SB3 and Herceptin® in women with HER2 positive breast cancer. National Institutes of Health, US National Library of Medicine, Bethesda, MD. 2014 (last update 2 May 2016). <https://clinicaltrials.gov/show/NCT02149524>. Accessed 21 June 2016.
