# Supplementary material for: Biosimilars for the Treatment of Cancer: A Systematic Review of Published Evidence
Source: PubMed Central journal article supplement — BioDrugs. 2017 Jan 11;31(1):1–36. doi: 10.1007/s40259-016-0207-0 (PMC5258783; doi:10.1007/s40259-016-0207-0), 2017-01-11
Supplement: 40259_2016_207_MOESM7_ESM.pdf [file 40259_2016_207_MOESM7_ESM.pdf]

**Supplementary Table S7. Leading 10 journals publishing on biosimilars in oncology (2002–2015)**

| Journal (total records, all years) <sup>a</sup>                     | Year     |          |          |          |          |          |          |          |
|---------------------------------------------------------------------|----------|----------|----------|----------|----------|----------|----------|----------|
|                                                                     | 2005     | 2009     | 2010     | 2011     | 2012     | 2013     | 2014     | 2015     |
| <i>mAbs</i> (n = 7)                                                 | 0        | 0        | 0        | 1        | 1        | 2        | 0        | 3        |
| <i>Targeted Oncology</i> (n = 3)                                    | 0        | 0        | 0        | 0        | 3        | 0        | 0        | 0        |
| <i>Seminars in Oncology</i> (n = 3)                                 | 0        | 0        | 0        | 0        | 0        | 2        | 1        | 0        |
| <i>Journal of the National Comprehensive Cancer Network</i> (n = 2) | 0        | 0        | 0        | 2        | 0        | 0        | 0        | 0        |
| <i>Blood</i> (n = 2)                                                | 0        | 0        | 0        | 1        | 1        | 0        | 0        | 0        |
| <i>Leukemia and Lymphoma</i> (n = 2)                                | 0        | 1        | 0        | 0        | 0        | 0        | 1        | 0        |
| <i>Oncologie</i> (n = 2)                                            | 1        | 0        | 0        | 1        | 0        | 0        | 0        | 0        |
| <i>Electrophoresis</i> (n = 2)                                      | 0        | 0        | 0        | 0        | 0        | 1        | 1        | 0        |
| <i>BioDrugs</i> (n = 2)                                             | 0        | 0        | 0        | 0        | 0        | 1        | 1        | 0        |
| <i>Expert Review of Anticancer Therapy</i> (n = 2)                  | 0        | 0        | 0        | 0        | 0        | 0        | 0        | 2        |
| <i>Annals of Oncology</i> (n = 2)                                   | 0        | 0        | 0        | 0        | 0        | 2        | 0        | 0        |
| <i>Future Oncology</i> (n = 2)                                      | 0        | 0        | 1        | 0        | 0        | 0        | 0        | 1        |
| <b>Grand total</b>                                                  | <b>1</b> | <b>1</b> | <b>1</b> | <b>5</b> | <b>5</b> | <b>8</b> | <b>4</b> | <b>6</b> |

<sup>a</sup> Publishing on biosimilars in the field of oncology.
