# Supplementary material for: Biosimilars for the Treatment of Cancer: A Systematic Review of Published Evidence
Source: PubMed Central journal article supplement — BioDrugs. 2017 Jan 11;31(1):1–36. doi: 10.1007/s40259-016-0207-0 (PMC5258783; doi:10.1007/s40259-016-0207-0), 2017-01-11
Supplement: 40259_2016_207_MOESM11_ESM.pdf [file 40259_2016_207_MOESM11_ESM.pdf]

**Supplementary Fig. S3** Full-text RCTs by (a) NICE STA assessment of full-text RCTs in two studies and (b) Jadad score of full-text RCTs in two studies.<sup>1,2</sup>

**a. NICE STA**

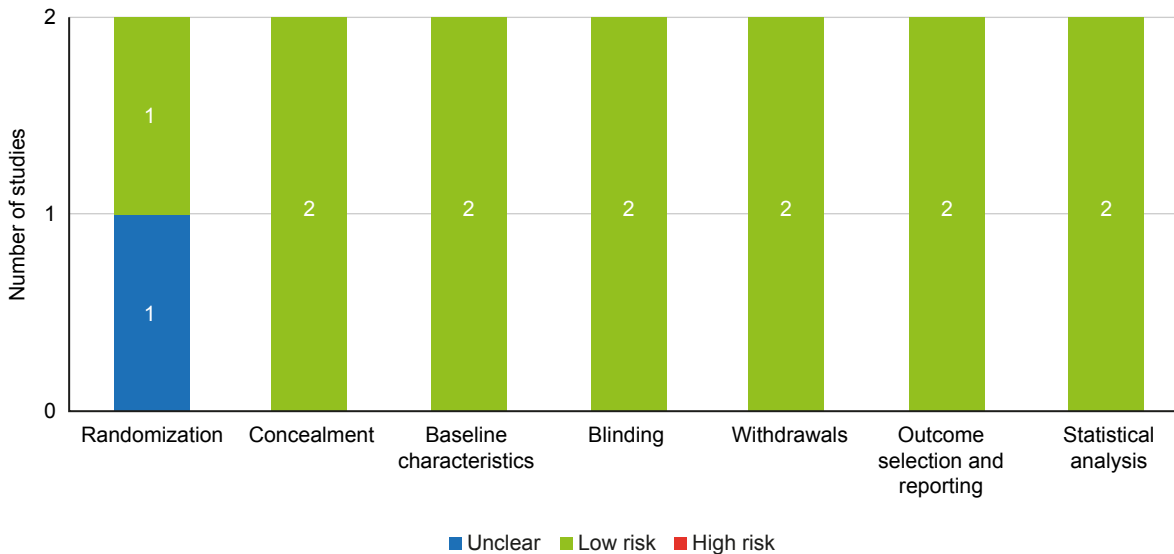

**b. Jadad score**

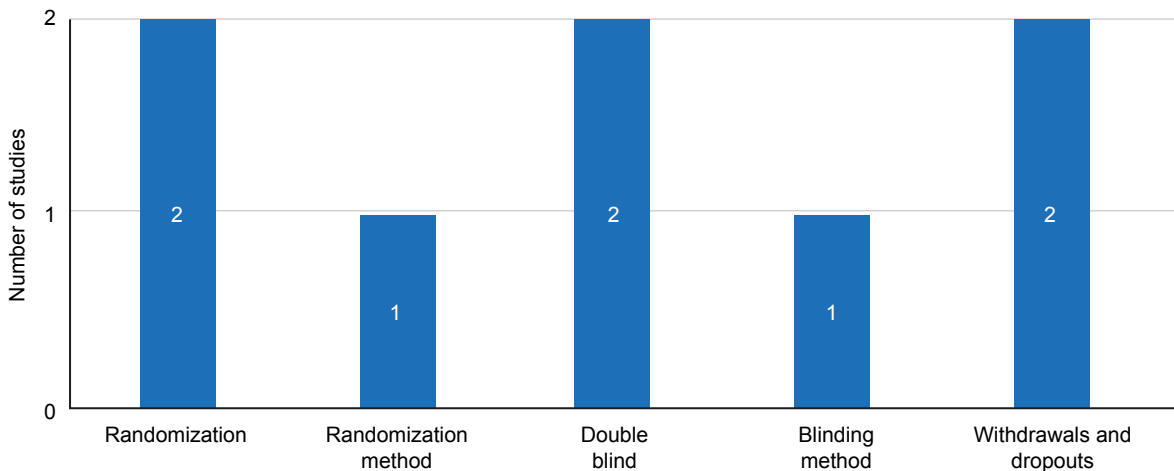

NICE National Institute for Health and Care Excellence, RCT randomized controlled trial, STA single technology appraisal.

**References**

1. Wisman LAB, et al. A phase I dose-escalation and bioequivalence study of a trastuzumab biosimilar in healthy male volunteers. Clin Drug Investig. 2014;34:887-94.
2. Yin D, et al. A randomized phase I pharmacokinetic trial comparing the potential biosimilar PF-05280014 with trastuzumab in healthy volunteers (REFLECTIONS B327-01). Br J Clin Pharmacol. 2014;78:1281-90.
