# Supplementary material for: Biosimilars for the Treatment of Cancer: A Systematic Review of Published Evidence
Source: PubMed Central journal article supplement — BioDrugs. 2017 Jan 11;31(1):1–36. doi: 10.1007/s40259-016-0207-0 (PMC5258783; doi:10.1007/s40259-016-0207-0), 2017-01-11
Supplement: 40259_2016_207_MOESM12_ESM.pdf [file 40259_2016_207_MOESM12_ESM.pdf]

**Supplementary Fig. S4** Downs and Black score of full-text observational studies: two studies<sup>1,2</sup>

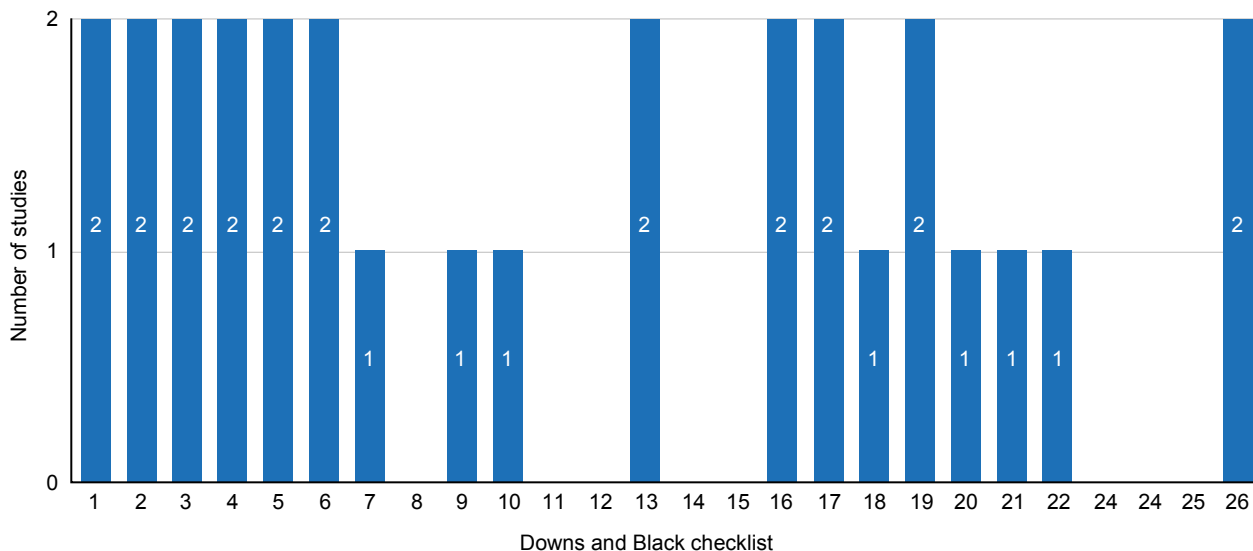

**References**

1. Wisman LAB, et al. A phase I dose-escalation and bioequivalence study of a trastuzumab biosimilar in healthy male volunteers. Clin Drug Investig. 2014;34:887-94.
2. Yin D, et al. A randomized phase 1 pharmacokinetic trial comparing the potential biosimilar PF-05280014 with trastuzumab in healthy volunteers (REFLECTIONS B327-01). Br J Clin Pharmacol. 2014;78:1281-90.
