# Supplementary material for: Biosimilars for the Treatment of Cancer: A Systematic Review of Published Evidence
Source: PubMed Central journal article supplement — BioDrugs. 2017 Jan 11;31(1):1–36. doi: 10.1007/s40259-016-0207-0 (PMC5258783; doi:10.1007/s40259-016-0207-0), 2017-01-11
Supplement: 40259_2016_207_MOESM14_ESM.pdf [file 40259_2016_207_MOESM14_ESM.pdf]

**Supplementary Fig. S6** SYRCLE's risk of bias scores of animal studies: three studies.<sup>1-3</sup>

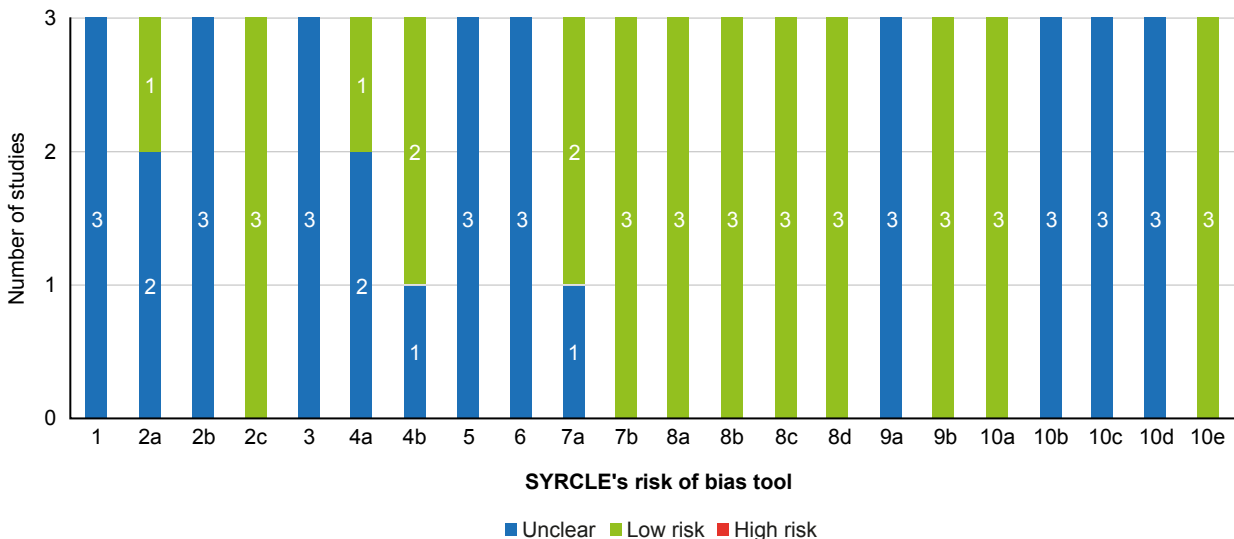

**References**

1. da Silva A, et al. Target-directed development and preclinical characterization of the proposed biosimilar rituximab GP2013. *Leuk Lymphoma*. 2014;55(7):1609-17.
2. Ryan AM, et al. Comparative nonclinical assessments of the proposed biosimilar PF-05280586 and rituximab (MabThera®). *Toxicol Pathol*. 2014;42(7):1069-81.
3. Hurst S, et al. Comparative nonclinical assessments of the proposed biosimilar PF-05280014 and trastuzumab (Herceptin®). *BioDrugs*. 2014;28(5):451-9.
