# Supplementary figures and images for: Biosimilars for the Treatment of Cancer: A Systematic Review of Published Evidence
Source: PubMed Central journal article supplement — BioDrugs. 2017 Jan 11;31(1):1–36. doi: 10.1007/s40259-016-0207-0 (PMC5258783; doi:10.1007/s40259-016-0207-0), 2017-01-11

## Supplementary Fig. S1 Jadad Scoring System

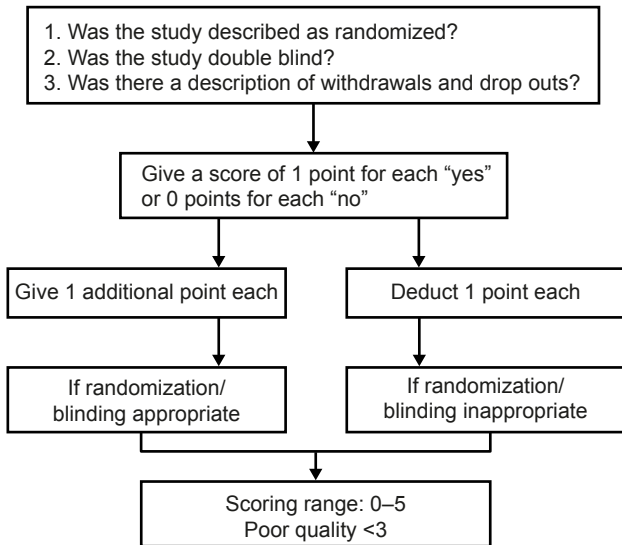

Supplement: 40259_2016_207_MOESM9_ESM.pdf [file 40259_2016_207_MOESM9_ESM.pdf]
